# Supplementary material for: Long-term health-related quality of life after mandibular resection and reconstruction
Source: Springer Nature journal article supplement (doi:10.1007/s00405-019-05371-2), 2019-03-16
Supplement: MOESM1 [file 16553822]

Appendix: Distribution of scores by length of follow-up.

|  |  | 0 | 25 | 30 | 50 | 70 | 75 | 100 |
| --- | --- | --- | --- | --- | --- | --- | --- | --- |
| Pain | ≤5 y | 1 | 3 |  | 2 |  | 3 | 8 |
| >5 y | 0 | 3 |  | 3 |  | 17 | 18 |
| Appearance | ≤5 y | 1 | 1 |  | 6 |  | 7 | 1 |
| >5 y | 1 | 4 |  | 12 |  | 11 | 13 |
| Activity | ≤5 y | 2 | 3 |  | 7 |  | 2 | 3 |
| >5 y | 1 | 1 |  | 7 |  | 9 | 23 |
| Recreation | ≤5 y | 2 | 2 |  | 4 |  | 4 | 3 |
| >5 y | 0 | 2 |  | 5 |  | 12 | 22 |
| Swallowing | ≤5 y | 6 |  | 0 |  | 1 |  | 10 |
| >5 y | 6 |  | 0 |  | 9 |  | 26 |
| Chewing | ≤5 y | 5 |  |  | 7 |  |  | 5 |
| >5 y | 6 |  |  | 17 |  |  | 18 |
| Speech | ≤5 y | 2 |  | 2 |  | 6 |  | 7 |
| >5 y | 1 |  | 2 |  | 13 |  | 25 |
| Shoulder | ≤5 y | 0 |  | 5 |  | 1 |  | 11 |
| >5 y | 0 |  | 8 |  | 1 |  | 32 |
| Taste | ≤5 y | 3 |  | 6 |  | 3 |  | 4 |
| >5 y | 4 |  | 7 |  | 7 |  | 23 |
| Saliva | ≤5 y | 5 |  | 3 |  | 2 |  | 7 |
| >5 y | 3 |  | 9 |  | 6 |  | 21 |
| Mood | ≤5 y | 2 | 2 |  | 3 |  | 4 | 6 |
| >5 y | 1 | 2 |  | 7 |  | 14 | 17 |
| Anxiety | ≤5 y | 2 |  | 5 |  | 1 |  | 7 |
| >5 y | 1 |  | 9 |  | 8 |  | 23 |
